# Supplementary material for: A silanized magnetic amino-functionalized carbon nanotube-based multi-ion imprinted polymer for the selective aqueous decontamination of heavy metal ions
Source: Royal Society of Chemistry journal article supplement (doi:10.1039/d2nj04105g), 2022-01-01
Supplement: d2nj04105g1.pdf [file d2nj04105g1.pdf]

## Electronic Supplementary Information

---

### Silanized magnetic amino-functionalized carbon nanotubes-based multi-ion imprinted polymer for the selective aqueous decontamination of heavy metal ions

Elahe Kasiri <sup>a</sup>, Payam Arabkhani <sup>b</sup>, Hedayat Haddadi <sup>a</sup>, Arash Asfaram <sup>b, \*</sup> Rajender S.

Varma <sup>c, \*</sup>

<sup>a</sup> *Department of Chemistry, Faculty of Sciences, Shahrekord University, P.O. Box 115, Shahrekord, Iran*

<sup>b</sup> *Medicinal Plants Research Center, Yasuj University of Medical Sciences, Yasuj, Iran*

<sup>c</sup> *Regional Centre of Advanced Technologies and Materials, Czech Advanced Technology and Research*

*Institute, Palacky University, Šlechtitelů 27, 783 71 Olomouc, Czech Republic*

---

---

**\*Corresponding author:** E-mail address: [arash.asfaram@yums.ac.ir](mailto:arash.asfaram@yums.ac.ir) (A. Asfaram); [varma.rajender@epa.gov](mailto:varma.rajender@epa.gov) (R. S. Varma)

## Section S1:

The surface functional groups of the prepared samples were investigated by the Fourier transform infrared spectra (FTIR, Thermo Nicolet, Avatar 360, USA) over the wavenumber range of 400–4000  $\text{cm}^{-1}$ . The surface morphologies and elemental composition of the samples were studied by the field emission scanning electronic microscopy (FESEM, Zeiss, SIGMA VP-500, Germany) equipped with energy dispersive X-ray spectroscopy (EDX), respectively. The specific surface area ( $\text{m}^2 \text{g}^{-1}$ ), total pore volume ( $\text{cm}^3 \text{g}^{-1}$ ), and mean pore diameter (nm) were measured using nitrogen adsorption/desorption isotherm with a Brunauer–Emmett–Teller (BET) analysis (BEL, Belsorp- mini II. Japan) at 77 K. The magnetic properties of samples were analyzed by a vibrating sample magnetizer (VSM, Lake Shore, 735 VSM, Model 7304, USA) at 300 K in a field of +5000 to -5000 Oe. The concentration of heavy metal ions were analyzed by inductively coupled plasma optical emission spectrometry (ICP-OES, Varian Vista MPX, Varian, Palo Alto, CA, USA).

## Section S2:

The adsorption capacity at equilibrium ( $q_e$ ), and each time ( $q_t$ ), and also the removal efficiency percentage ( $R\%$ ) were evaluated through equations:

$$q_e = \frac{(C_0 - C_e)V}{m} \quad (1)$$

$$q_t = \frac{(C_0 - C_t)V}{m} \quad (2)$$

$$(R\%) = \frac{(C_0 - C_e)}{C_0} \times 100\% \quad (3)$$

where  $q_e$  and  $q_t$  ( $\text{mg g}^{-1}$ ) shows the amount of adsorption at equilibrium and at time  $t$ , respectively while  $C_0$ ,  $C_e$ , and  $C_t$  ( $\text{mg L}^{-1}$ ) refer to the initial, equilibrium, and ion concentration at any time ( $t$ ), respectively. Also,  $V$  (L) presents the volume of the contaminated solution, and  $m$  (g) denotes the mass of dry adsorbent.

**Table S1.** Experimental independent variables of central composite design (CCD) with coded levels and actual responses (removal %).

| Independent variable           |                |                    | Variable levels |                |                |                |                 |                  |                  |                  |                  |
|--------------------------------|----------------|--------------------|-----------------|----------------|----------------|----------------|-----------------|------------------|------------------|------------------|------------------|
| Factors                        | Coded          | Units              | - $\alpha$ (-2) | Low (-1)       | Center (0)     | High(+1)       | + $\alpha$ (+2) |                  |                  |                  |                  |
| pH                             | X <sub>1</sub> | -                  | 4.0             | 5.0            | 6.0            | 7.0            | 8.0             |                  |                  |                  |                  |
| Adsorbent mass                 | X <sub>2</sub> | mg                 | 6.0             | 12             | 18             | 24             | 30              |                  |                  |                  |                  |
| Contact time                   | X <sub>3</sub> | min                | 7.0             | 14             | 21             | 28             | 35              |                  |                  |                  |                  |
| Hg <sup>2+</sup> concentration | X <sub>4</sub> | mg L <sup>-1</sup> | 10              | 20             | 30             | 40             | 50              |                  |                  |                  |                  |
| Cd <sup>2+</sup> concentration | X <sub>5</sub> | mg L <sup>-1</sup> | 8.0             | 16             | 24             | 32             | 40              |                  |                  |                  |                  |
| Cu <sup>2+</sup> concentration | X <sub>6</sub> | mg L <sup>-1</sup> | 6.0             | 12             | 18             | 24             | 30              |                  |                  |                  |                  |
| Ni <sup>2+</sup> concentration | X <sub>7</sub> | mg L <sup>-1</sup> | 4.0             | 8.0            | 12.0           | 16             | 20              |                  |                  |                  |                  |
| Variables                      |                |                    |                 |                |                |                |                 | Response (%)     |                  |                  |                  |
| Run                            | X <sub>1</sub> | X <sub>2</sub>     | X <sub>3</sub>  | X <sub>4</sub> | X <sub>5</sub> | X <sub>6</sub> | X <sub>7</sub>  | Hg <sup>2+</sup> | Cd <sup>2+</sup> | Cu <sup>2+</sup> | Ni <sup>2+</sup> |
| 1                              | 5.0            | 24                 | 28              | 40             | 16             | 12             | 16              | 93.89            | 84.87            | 80.97            | 90.87            |
| 2                              | 6.0            | 18                 | 21              | 30             | 24             | 18             | 12              | 80.63            | 85.11            | 76.45            | 74.23            |
| 3                              | 6.0            | 18                 | 21              | 50             | 24             | 18             | 12              | 44.01            | 50.87            | 43.87            | 23.98            |
| 4                              | 5.0            | 24                 | 14              | 40             | 16             | 12             | 8               | 82.58            | 85.98            | 90.76            | 97.89            |
| 5                              | 6.0            | 18                 | 21              | 30             | 24             | 18             | 12              | 82.87            | 85.21            | 78.35            | 73.54            |
| 6                              | 7.0            | 12                 | 14              | 40             | 16             | 12             | 8               | 34.69            | 42.56            | 25.76            | 41.98            |
| 7                              | 6.0            | 18                 | 21              | 30             | 24             | 18             | 12              | 84.11            | 84.54            | 74.76            | 72.67            |
| 8                              | 7.0            | 12                 | 14              | 20             | 32             | 12             | 8               | 49.36            | 49.69            | 33.76            | 54.76            |
| 9                              | 5.0            | 24                 | 14              | 20             | 32             | 24             | 16              | 58.36            | 69.87            | 74.98            | 73.25            |
| 10                             | 5.0            | 12                 | 28              | 40             | 32             | 24             | 8               | 67.36            | 17.89            | 68.76            | 65.87            |
| 11                             | 5.0            | 24                 | 28              | 20             | 16             | 24             | 8               | 95.69            | 90.87            | 99.81            | 99.05            |
| 12                             | 7.0            | 24                 | 28              | 20             | 32             | 12             | 8               | 60.48            | 70.98            | 59.34            | 69.31            |
| 13                             | 7.0            | 24                 | 14              | 40             | 32             | 12             | 16              | 46.91            | 51.98            | 40.31            | 46.76            |
| 14                             | 6.0            | 18                 | 21              | 30             | 24             | 6              | 12              | 95.42            | 98.76            | 94.34            | 91.23            |
| 15                             | 6.0            | 18                 | 21              | 30             | 24             | 18             | 12              | 82.67            | 86.65            | 78.67            | 75.34            |
| 16                             | 6.0            | 18                 | 21              | 30             | 24             | 30             | 12              | 77.42            | 60.54            | 58.76            | 62.34            |
| 17                             | 6.0            | 18                 | 7               | 30             | 24             | 18             | 12              | 31.74            | 41.76            | 38.96            | 45.61            |
| 18                             | 7.0            | 12                 | 14              | 40             | 32             | 24             | 16              | 18.32            | 28.54            | 12.87            | 25.43            |
| 19                             | 6.0            | 18                 | 21              | 10             | 24             | 18             | 12              | 99.63            | 96.76            | 87.76            | 83.23            |
| 20                             | 5.0            | 12                 | 28              | 20             | 16             | 12             | 16              | 28.74            | 56.89            | 70.76            | 69.65            |
| 21                             | 7.0            | 12                 | 14              | 20             | 16             | 24             | 16              | 40.47            | 29.45            | 20.86            | 27.98            |
| 22                             | 7.0            | 24                 | 28              | 20             | 32             | 24             | 16              | 55.11            | 60.32            | 78.87            | 55.44            |
| 23                             | 5.0            | 12                 | 28              | 40             | 32             | 12             | 16              | 73.59            | 27.87            | 79.98            | 48.87            |
| 24                             | 5.0            | 12                 | 14              | 20             | 32             | 24             | 8               | 59.36            | 40.65            | 73.56            | 84.65            |
| 25                             | 7.0            | 12                 | 28              | 20             | 16             | 12             | 16              | 68.99            | 39.81            | 49.68            | 41.98            |
| 26                             | 7.0            | 24                 | 28              | 40             | 16             | 24             | 8               | 67.10            | 78.76            | 61.76            | 71.52            |
| 27                             | 5.0            | 24                 | 14              | 40             | 32             | 12             | 16              | 68.69            | 76.98            | 70.98            | 65.69            |
| 28                             | 7.0            | 24                 | 14              | 40             | 16             | 24             | 8               | 54.43            | 68.76            | 37.65            | 65.96            |
| 29                             | 4.0            | 18                 | 21              | 30             | 24             | 18             | 12              | 45.11            | 38.56            | 54.65            | 48.95            |
| 30                             | 5.0            | 24                 | 14              | 20             | 16             | 24             | 16              | 69.36            | 87.74            | 78.87            | 80.76            |
| 31                             | 6.0            | 18                 | 21              | 30             | 24             | 18             | 20              | 66.64            | 78.76            | 45.76            | 70.45            |
| 32                             | 7.0            | 12                 | 28              | 40             | 16             | 24             | 16              | 47.93            | 56.98            | 25.64            | 63.54            |
| 33                             | 6.0            | 6                  | 21              | 30             | 24             | 18             | 12              | 21.64            | 46.65            | 39.35            | 41.49            |
| 34                             | 6.0            | 18                 | 21              | 30             | 8              | 18             | 12              | 94.74            | 90.98            | 83.65            | 91.23            |
| 35                             | 6.0            | 18                 | 21              | 30             | 24             | 18             | 4               | 86.64            | 90.87            | 97.87            | 99.45            |
| 36                             | 5.0            | 12                 | 14              | 20             | 16             | 12             | 8               | 65.69            | 45.98            | 57.65            | 70.87            |
| 37                             | 6.0            | 30                 | 21              | 30             | 24             | 18             | 12              | 91.33            | 95.65            | 94.35            | 97.36            |
| 38                             | 6.0            | 18                 | 21              | 30             | 40             | 18             | 12              | 61.53            | 45.65            | 64.54            | 58.56            |
| 39                             | 6.0            | 18                 | 35              | 30             | 24             | 18             | 12              | 94.44            | 90.76            | 95.76            | 93.06            |
| 40                             | 8.0            | 18                 | 21              | 30             | 24             | 18             | 12              | 58.44            | 49.78            | 40.56            | 39.98            |

**Table S2.** Analysis of variance (ANOVA) results of the quadratic model to removal of Hg<sup>2+</sup> and Cd<sup>2+</sup> from contaminated water.

| Source of variation                       | DF             | R% Hg <sup>2+</sup> |                     |              |                    | R% Cd <sup>2+</sup> |              |              |                    |
|-------------------------------------------|----------------|---------------------|---------------------|--------------|--------------------|---------------------|--------------|--------------|--------------------|
|                                           |                | SS                  | MS                  | F-value      | P-value            | SS                  | MS           | F-value      | P-value            |
| <b>Model</b>                              | <b>35</b>      | <b>18700</b>        | <b>534.5</b>        | <b>297.2</b> | <b>&lt; 0.0001</b> | <b>20600</b>        | <b>588.6</b> | <b>255.4</b> | <b>&lt; 0.0001</b> |
| X <sub>1</sub>                            | 1              | 88.84               | 88.84               | 49.4         | 0.0022             | 62.94               | 62.94        | 27.32        | 0.0064             |
| X <sub>2</sub>                            | 1              | 2428                | 2428                | 1350         | < 0.0001           | 1201                | 1201         | 521          | < 0.0001           |
| X <sub>3</sub>                            | 1              | 1966                | 1966                | 1093         | < 0.0001           | 1201                | 1201         | 521          | < 0.0001           |
| X <sub>4</sub>                            | 1              | 1547                | 1547                | 860.1        | < 0.0001           | 1053                | 1053         | 457          | < 0.0001           |
| X <sub>5</sub>                            | 1              | 551.5               | 551.5               | 306.6        | < 0.0001           | 1027                | 1027         | 445.9        | < 0.0001           |
| X <sub>6</sub>                            | 1              | 162                 | 162                 | 90.08        | 0.0007             | 730.4               | 730.4        | 317          | < 0.0001           |
| X <sub>7</sub>                            | 1              | 200                 | 200                 | 111.2        | 0.0005             | 73.33               | 73.33        | 31.82        | 0.0049             |
| X <sub>1</sub> X <sub>2</sub>             | 1              | 5.983               | 5.983               | 3.326        | 0.1422             | 22.02               | 22.02        | 9.559        | 0.0365             |
| X <sub>1</sub> X <sub>3</sub>             | 1              | 8.638               | 8.638               | 4.803        | 0.0935             | 29.14               | 29.14        | 12.65        | 0.0237             |
| X <sub>1</sub> X <sub>4</sub>             | 1              | 18.72               | 18.72               | 10.41        | 0.0321             | 250.5               | 250.5        | 108.7        | 0.0005             |
| X <sub>1</sub> X <sub>5</sub>             | 1              | 199.4               | 199.4               | 110.9        | 0.0005             | 235.6               | 235.6        | 102.3        | 0.0005             |
| X <sub>1</sub> X <sub>6</sub>             | 1              | 11.16               | 11.16               | 6.205        | 0.0674             | 299.3               | 299.3        | 129.9        | 0.0003             |
| X <sub>1</sub> X <sub>7</sub>             | 1              | 6.509               | 6.509               | 3.619        | 0.1299             | 9.608               | 9.608        | 4.17         | 0.1107             |
| X <sub>2</sub> X <sub>3</sub>             | 1              | 48.52               | 48.52               | 26.98        | 0.0065             | 274.9               | 274.9        | 119.3        | 0.0004             |
| X <sub>2</sub> X <sub>4</sub>             | 1              | 15.4                | 15.4                | 8.564        | 0.0430             | 69.53               | 69.53        | 30.18        | 0.0051             |
| X <sub>2</sub> X <sub>5</sub>             | 1              | 446.4               | 446.4               | 248.2        | < 0.0001           | 793.8               | 793.8        | 344.5        | < 0.0001           |
| X <sub>2</sub> X <sub>6</sub>             | 1              | 25.92               | 25.92               | 14.41        | 0.01916            | 35.04               | 35.04        | 15.21        | 0.0176             |
| X <sub>2</sub> X <sub>7</sub>             | 1              | 106.4               | 106.4               | 59.18        | 0.0015             | 308.3               | 308.3        | 133.8        | 0.0003             |
| X <sub>3</sub> X <sub>4</sub>             | 1              | 22.6                | 22.6                | 12.56        | 0.0239             | 295.5               | 295.5        | 128.2        | 0.0004             |
| X <sub>3</sub> X <sub>5</sub>             | 1              | 0.070               | 0.070               | 0.039        | 0.8536             | 3.265               | 3.265        | 1.417        | 0.2997             |
| X <sub>3</sub> X <sub>6</sub>             | 1              | 1.378               | 1.378               | 0.7663       | 0.4308             | 20.2                | 20.2         | 8.766        | 0.0415             |
| X <sub>3</sub> X <sub>7</sub>             | 1              | 11.54               | 11.54               | 6.419        | 0.0644             | 117.1               | 117.1        | 50.83        | 0.0021             |
| X <sub>4</sub> X <sub>5</sub>             | 1              | 105.8               | 105.8               | 58.81        | 0.0016             | 83.02               | 83.02        | 36.03        | 0.0039             |
| X <sub>4</sub> X <sub>6</sub>             | 1              | 2.84                | 2.84                | 1.579        | 0.2773             | 137.7               | 137.7        | 59.77        | 0.0015             |
| X <sub>4</sub> X <sub>7</sub>             | 1              | 18.93               | 18.93               | 10.52        | 0.0316             | 93.26               | 93.26        | 40.48        | 0.0031             |
| X <sub>5</sub> X <sub>6</sub>             | 1              | 11.57               | 11.57               | 6.435        | 0.0642             | 27.16               | 27.16        | 11.79        | 0.02646            |
| X <sub>5</sub> X <sub>7</sub>             | 1              | 34.1                | 34.1                | 18.96        | 0.0121             | 54.69               | 54.69        | 23.73        | 0.0082             |
| X <sub>6</sub> X <sub>7</sub>             | 1              | 67.07               | 67.07               | 37.29        | 0.0036             | 284                 | 284          | 123.3        | 0.0004             |
| X <sub>1</sub> <sup>2</sup>               | 1              | 1800                | 1800                | 1001         | < 0.0001           | 3534                | 3534         | 1534         | < 0.0001           |
| X <sub>2</sub> <sup>2</sup>               | 1              | 1284                | 1284                | 713.9        | < 0.0001           | 470.7               | 470.7        | 204.3        | 0.0001             |
| X <sub>3</sub> <sup>2</sup>               | 1              | 707                 | 707                 | 393.1        | < 0.0001           | 814.4               | 814.4        | 353.4        | < 0.0001           |
| X <sub>4</sub> <sup>2</sup>               | 1              | 206.6               | 206.6               | 114.9        | 0.0004             | 322.8               | 322.8        | 140.1        | 0.0003             |
| X <sub>5</sub> <sup>2</sup>               | 1              | 30.65               | 30.65               | 17.04        | 0.0145             | 658.6               | 658.6        | 285.8        | < 0.0001           |
| X <sub>6</sub> <sup>2</sup>               | 1              | 36.7                | 36.7                | 20.41        | 0.0107             | 96.04               | 96.04        | 41.68        | 0.0030             |
| X <sub>7</sub> <sup>2</sup>               | 1              | 58.19               | 58.19               | 32.35        | 0.0047             | 6.616               | 6.616        | 2.871        | 0.1654             |
| Residual                                  | 4              | 7.194               | 1.798               |              |                    | 9.217               | 2.304        |              |                    |
| Lack of Fit                               | 1              | 0.9587              | 0.9587              | 0.4613       | 0.5457             | 6.797               | 6.797        | 8.425        | 0.0624             |
| Pure Error                                | 3              | 6.235               | 2.078               |              |                    | 2.42                | 0.8068       |              |                    |
| Corr. Total                               | 39             | 18700               |                     |              |                    | 20600               |              |              |                    |
| <b>Quadratic model summary statistics</b> |                |                     |                     |              |                    |                     |              |              |                    |
| Response                                  | R <sup>2</sup> | Adj- R <sup>2</sup> | Pre- R <sup>2</sup> | CV (%)       | SD                 | AP                  |              |              |                    |
| <b>R% Hg<sup>2+</sup></b>                 | 0.999          | 0.9996              | 0.956               | 2.058        | 1.341              | 64.11               |              |              |                    |
| <b>R% Cd<sup>2+</sup></b>                 | 0.999          | 0.996               | 0.934               | 2.352        | 1.518              | 55.57               |              |              |                    |

**Table S3.** Analysis of variance (ANOVA) results of the quadratic model to removal of Cu<sup>2+</sup> and Ni<sup>2+</sup> from contaminated water.

| Source of variation                       | DF             | R% Cu <sup>2+</sup> |                     |              |                    | R% Ni <sup>2+</sup> |              |              |                    |
|-------------------------------------------|----------------|---------------------|---------------------|--------------|--------------------|---------------------|--------------|--------------|--------------------|
|                                           |                | SS                  | MS                  | F-value      | P-value            | SS                  | MS           | F-value      | P-value            |
| <b>Model</b>                              | <b>35</b>      | <b>21420</b>        | <b>612.1</b>        | <b>232.9</b> | <b>&lt; 0.0001</b> | <b>171060</b>       | <b>487.5</b> | <b>198.9</b> | <b>&lt; 0.0001</b> |
| X <sub>1</sub>                            | 1              | 99.26               | 99.26               | 37.77        | 0.0036             | 40.23               | 40.23        | 16.41        | 0.0155             |
| X <sub>2</sub>                            | 1              | 1513                | 1513                | 575.5        | < 0.0001           | 1561                | 1561         | 636.8        | < 0.0001           |
| X <sub>3</sub>                            | 1              | 1613                | 1613                | 613.7        | < 0.0001           | 1126                | 1126         | 459.3        | < 0.0001           |
| X <sub>4</sub>                            | 1              | 963.2               | 963.2               | 366.5        | < 0.0001           | 1755                | 1755         | 716.1        | < 0.0001           |
| X <sub>5</sub>                            | 1              | 182.6               | 182.6               | 69.47        | 0.0011             | 533.7               | 533.7        | 217.7        | 0.0001             |
| X <sub>6</sub>                            | 1              | 633                 | 633                 | 240.8        | 0.0001             | 417.3               | 417.3        | 170.3        | 0.0002             |
| X <sub>7</sub>                            | 1              | 1358                | 1358                | 516.6        | < 0.0001           | 420.5               | 420.5        | 171.6        | 0.0002             |
| X <sub>1</sub> X <sub>2</sub>             | 1              | 333.7               | 333.7               | 127          | 0.0004             | 87.01               | 87.01        | 35.5         | 0.0040             |
| X <sub>1</sub> X <sub>3</sub>             | 1              | 4.508               | 4.508               | 1.715        | 0.2605             | 115.5               | 115.5        | 47.11        | 0.0024             |
| X <sub>1</sub> X <sub>4</sub>             | 1              | 17.02               | 17.02               | 6.475        | 0.0637             | 299.6               | 299.6        | 122.2        | 0.0004             |
| X <sub>1</sub> X <sub>5</sub>             | 1              | 215.5               | 215.5               | 82           | 0.0008             | 304.3               | 304.3        | 124.1        | 0.0004             |
| X <sub>1</sub> X <sub>6</sub>             | 1              | 189                 | 189                 | 71.92        | 0.0011             | 134.4               | 134.4        | 54.85        | 0.0018             |
| X <sub>1</sub> X <sub>7</sub>             | 1              | 18.01               | 18.01               | 6.852        | 0.0590             | 1.834               | 1.834        | 0.748        | 0.4358             |
| X <sub>2</sub> X <sub>3</sub>             | 1              | 184.7               | 184.7               | 70.28        | 0.0011             | 260.3               | 260.3        | 106.2        | 0.0005             |
| X <sub>2</sub> X <sub>4</sub>             | 1              | 2.128               | 2.128               | 0.8097       | 0.4191             | 35.66               | 35.66        | 14.55        | 0.0189             |
| X <sub>2</sub> X <sub>5</sub>             | 1              | 634.4               | 634.4               | 241.4        | 0.0001             | 769.5               | 769.5        | 314          | < 0.0001           |
| X <sub>2</sub> X <sub>6</sub>             | 1              | 11.18               | 11.18               | 4.252        | 0.1082             | 2.201               | 2.201        | 0.898        | 0.3970             |
| X <sub>2</sub> X <sub>7</sub>             | 1              | 155.3               | 155.3               | 59.08        | 0.0015             | 84.96               | 84.96        | 34.66        | 0.0042             |
| X <sub>3</sub> X <sub>4</sub>             | 1              | 63.68               | 63.68               | 24.23        | 0.0080             | 83.77               | 83.77        | 34.18        | 0.0043             |
| X <sub>3</sub> X <sub>5</sub>             | 1              | 177.4               | 177.4               | 67.5         | 0.0012             | 3.279               | 3.279        | 1.338        | 0.3118             |
| X <sub>3</sub> X <sub>6</sub>             | 1              | 0.336               | 0.336               | 0.128        | 0.7389             | 92.69               | 92.69        | 37.82        | 0.0036             |
| X <sub>3</sub> X <sub>7</sub>             | 1              | 10.87               | 10.87               | 4.134        | 0.1118             | 29.2                | 29.2         | 11.91        | 0.0260             |
| X <sub>4</sub> X <sub>5</sub>             | 1              | 44.21               | 44.21               | 16.82        | 0.0148             | 10.86               | 10.86        | 4.43         | 0.1031             |
| X <sub>4</sub> X <sub>6</sub>             | 1              | 377                 | 377                 | 143.4        | 0.0003             | 98.32               | 98.32        | 40.11        | 0.0032             |
| X <sub>4</sub> X <sub>7</sub>             | 1              | 13.31               | 13.31               | 5.064        | 0.0876             | 78.5                | 78.5         | 32.03        | 0.0048             |
| X <sub>5</sub> X <sub>6</sub>             | 1              | 36.86               | 36.86               | 14.02        | 0.0200             | 77.73               | 77.73        | 31.71        | 0.0049             |
| X <sub>5</sub> X <sub>7</sub>             | 1              | 21.28               | 21.28               | 8.096        | 0.0466             | 43.12               | 43.12        | 17.59        | 0.0138             |
| X <sub>6</sub> X <sub>7</sub>             | 1              | 300.8               | 300.8               | 114.4        | 0.0004             | 243.4               | 243.4        | 99.3         | 0.0006             |
| X <sub>1</sub> <sup>2</sup>               | 1              | 1743                | 1743                | 663          | < 0.0001           | 1567                | 1567         | 639.1        | < 0.0001           |
| X <sub>2</sub> <sup>2</sup>               | 1              | 219.4               | 219.4               | 83.48        | 0.0008             | 21.62               | 21.62        | 8.822        | 0.0411             |
| X <sub>3</sub> <sup>2</sup>               | 1              | 198.8               | 198.8               | 75.63        | 0.0010             | 22.81               | 22.81        | 9.306        | 0.0380             |
| X <sub>4</sub> <sup>2</sup>               | 1              | 264.4               | 264.4               | 100.6        | 0.0006             | 717.6               | 717.6        | 292.8        | < 0.0001           |
| X <sub>5</sub> <sup>2</sup>               | 1              | 21.84               | 21.84               | 8.311        | 0.0450             | 9.028               | 9.028        | 3.683        | 0.1274             |
| X <sub>6</sub> <sup>2</sup>               | 1              | 1.533               | 1.533               | 0.5834       | 0.4875             | 31.92               | 31.92        | 13.02        | 0.0226             |
| X <sub>7</sub> <sup>2</sup>               | 1              | 61.85               | 61.85               | 23.53        | 0.0083             | 291.6               | 291.6        | 119          | 0.0004             |
| Residual                                  | 4              | 10.51               | 2.628               |              |                    | 9.804               | 2.451        |              |                    |
| Lack of Fit                               | 1              | 0.595               | 0.595               | 0.18         | 0.7000             | 5.987               | 5.987        | 4.706        | 0.1185             |
| Pure Error                                | 3              | 9.918               | 3.306               |              |                    | 3.817               | 1.272        |              |                    |
| Corr. Total                               | 39             | 21420               |                     |              |                    | 17060               |              |              |                    |
| <b>Quadratic model summary statistics</b> |                |                     |                     |              |                    |                     |              |              |                    |
| Response                                  | R <sup>2</sup> | Adj- R <sup>2</sup> | Pre- R <sup>2</sup> | CV (%)       | SD                 | AP                  |              |              |                    |
| R% Cu <sup>2+</sup>                       | 0.999          | 0.995               | 0.955               | 2.551        | 2.621              | 56.43               |              |              |                    |
| R% Ni <sup>2+</sup>                       | 0.999          | 0.994               | 0.928               | 2.36         | 1.566              | 50.81               |              |              |                    |

**Table S4.** Isotherm parameters for the adsorption of target heavy metal ions by SMACNT-MIIP.

| <b>Isotherm</b>                                                            | <b>Plot</b>                                          | <b>Parameters</b>                                       | <b>Hg<sup>2+</sup></b> | <b>Cd<sup>2+</sup></b> | <b>Cu<sup>2+</sup></b> | <b>Ni<sup>2+</sup></b> |
|----------------------------------------------------------------------------|------------------------------------------------------|---------------------------------------------------------|------------------------|------------------------|------------------------|------------------------|
| <b>Langmuir</b><br>$\frac{C_e}{q_e} = \frac{1}{Q_m k_L} + \frac{C_e}{Q_m}$ | <i>C<sub>e</sub>/q<sub>e</sub> vs. C<sub>e</sub></i> | Q <sub>m</sub> (mg g <sup>-1</sup> )                    | 105.34                 | 91.79                  | 75.03                  | 63.54                  |
|                                                                            |                                                      | K <sub>L</sub> (L mg <sup>-1</sup> )                    | 2.779                  | 3.614                  | 4.188                  | 4.088                  |
|                                                                            |                                                      | R <sup>2</sup>                                          | 0.998                  | 0.992                  | 0.999                  | 0.996                  |
|                                                                            |                                                      | R <sub>L</sub> =1/(1+(K <sub>L</sub> ×C <sub>0</sub> )) | 0.007-0.067            | 0.007-0.065            | 0.006-0.056            | 0.008-0.075            |
| <b>Freundlich</b><br>$\ln q_e = \ln K_F + \frac{1}{n} \ln C_e$             | <i>ln q<sub>e</sub> vs. ln C<sub>e</sub></i>         | 1/n                                                     | 0.337                  | 0.303                  | 0.235                  | 0.269                  |
|                                                                            |                                                      | K <sub>F</sub> (L mg <sup>-1</sup> )                    | 6.009                  | 5.957                  | 5.426                  | 5.117                  |
|                                                                            |                                                      | R <sup>2</sup>                                          | 0.962                  | 0.979                  | 0.972                  | 0.967                  |
| <b>Temkin</b><br>$q_e = B_1 \ln K_T + B_1 \ln C_e$                         | <i>q<sub>e</sub> vs. ln C<sub>e</sub></i>            | B <sub>1</sub>                                          | 15.53                  | 11.10                  | 7.94                   | 7.06                   |
|                                                                            |                                                      | K <sub>T</sub> (L mg <sup>-1</sup> )                    | 1.000                  | 1.000                  | 1.000                  | 1.000                  |
|                                                                            |                                                      | R <sup>2</sup>                                          | 0.953                  | 0.885                  | 0.913                  | 0.861                  |
| <b>Dubinin-Radushkevich</b><br>$\ln q_e = \ln Q_s - k\varepsilon^2$        | <i>ln q<sub>e</sub> vs. ε<sup>2</sup></i>            | Q <sub>s</sub> (mg g <sup>-1</sup> )                    | 74.83                  | 59.44                  | 53.77                  | 41.97                  |
|                                                                            |                                                      | β                                                       | -1.6E-08               | -7.9E-09               | -5.9E-09               | -6.1E-09               |
|                                                                            |                                                      | E (kJ mol <sup>-1</sup> )                               | 5.651                  | 7.952                  | 9.183                  | 9.056                  |
|                                                                            |                                                      | R <sup>2</sup>                                          | 0.830                  | 0.772                  | 0.758                  | 0.735                  |

**Table S5.** Adsorption kinetic parameters for the adsorption of target heavy metal ions by SMACNT-MIIP.

| Model                                                                                       | Plot                             | Parameters                                           | Hg <sup>2+</sup> | Cd <sup>2+</sup> | Cu <sup>2+</sup> | Ni <sup>2+</sup> |
|---------------------------------------------------------------------------------------------|----------------------------------|------------------------------------------------------|------------------|------------------|------------------|------------------|
| <b>First-order- kinetic</b><br>$\ln(q_e - q_t) = \ln q_e - k_1 t$                           | $\ln (q_e - q_t) \text{ vs. } t$ | $k_1$ (min <sup>-1</sup> )                           | 0.1910           | 0.2065           | 0.1352           | 0.1799           |
|                                                                                             |                                  | $q_e$ (calc) (mg g <sup>-1</sup> )                   | 233.42           | 162.75           | 69.30            | 64.61            |
|                                                                                             |                                  | $R^2$                                                | 0.8874           | 0.8312           | 0.9369           | 0.8739           |
| <b>Pseudo-second-order-kinetic</b><br>$\frac{t}{q_t} = \frac{1}{k_2 q_e^2} + \frac{t}{q_e}$ | $t/q_t \text{ vs. } t$           | $k_2$ (min <sup>-1</sup> )                           | 0.0008           | 0.0022           | 0.0020           | 0.0045           |
|                                                                                             |                                  | $q_e$ (calc) (mg g <sup>-1</sup> )                   | 100.57           | 60.08            | 57.92            | 34.67            |
|                                                                                             |                                  | $R^2$                                                | 0.9906           | 0.9942           | 0.9880           | 0.9987           |
|                                                                                             |                                  | $h$ (mg g <sup>-1</sup> min <sup>-1</sup> )          | 8.36             | 7.96             | 6.66             | 5.43             |
| <b>Intraparticle diffusion</b><br>$q_t = k_{diff} t^{1/2} + C$                              | $q_t \text{ vs. } t^{1/2}$       | $K_{diff}$ (mg g <sup>-1</sup> min <sup>-1/2</sup> ) | 11.94            | 6.43             | 6.32             | 3.57             |
|                                                                                             |                                  | $C$ (mg g <sup>-1</sup> )                            | 6.40             | 12.63            | 10.04            | 8.96             |
|                                                                                             |                                  | $R^2$                                                | 0.9274           | 0.9495           | 0.9500           | 0.9420           |
| <b>Elovich</b><br>$q_t = \frac{1}{\beta} \ln(t) + \frac{1}{\beta} \ln(\alpha\beta)$         | $q_t \text{ vs. } \ln t$         | $\beta$ (g mg <sup>-1</sup> )                        | 16.47            | 18.82            | 15.61            | 13.38            |
|                                                                                             |                                  | $\alpha$ (mg g <sup>-1</sup> min <sup>-1</sup> )     | 0.0422           | 0.0795           | 0.0817           | 0.1413           |
|                                                                                             |                                  | $R^2$                                                | 0.9797           | 0.9737           | 0.9543           | 0.9904           |
| <b>Experimental data</b>                                                                    |                                  | $q_e$ (exp) (mg g <sup>-1</sup> )                    | 74.71            | 49.78            | 47.00            | 29.53            |



**Table S6.** The thermodynamic parameters for the adsorption of target heavy metal ions.

|                                                                       | <b>Hg<sup>2+</sup></b>                                   | <b>Cd<sup>2+</sup></b> | <b>Cu<sup>2+</sup></b> | <b>Ni<sup>2+</sup></b> |
|-----------------------------------------------------------------------|----------------------------------------------------------|------------------------|------------------------|------------------------|
| <b>T(k)</b>                                                           | <b><math>\Delta G^\circ</math> (kJ mol<sup>-1</sup>)</b> |                        |                        |                        |
| 278.15                                                                | -0.76                                                    | -0.20                  | -0.44                  | -0.73                  |
| 288.15                                                                | -2.70                                                    | -1.30                  | -1.05                  | -1.37                  |
| 298.15                                                                | -3.89                                                    | -2.61                  | -2.36                  | -2.12                  |
| 308.15                                                                | -5.95                                                    | -3.82                  | -3.59                  | -3.49                  |
| 318.15                                                                | -7.92                                                    | -4.99                  | -4.77                  | -4.37                  |
| <b>R<sup>2</sup></b>                                                  | <b>0.992</b>                                             | <b>0.999</b>           | <b>0.986</b>           | <b>0.979</b>           |
| <b><math>\Delta S^\circ</math>(J mol<sup>-1</sup> k<sup>-1</sup>)</b> | <b>175.11</b>                                            | <b>120.86</b>          | <b>111.29</b>          | <b>93.07</b>           |
| <b><math>\Delta H^\circ</math>(kJ mol<sup>-1</sup>)</b>               | <b>47.97</b>                                             | <b>33.45</b>           | <b>30.74</b>           | <b>25.33</b>           |

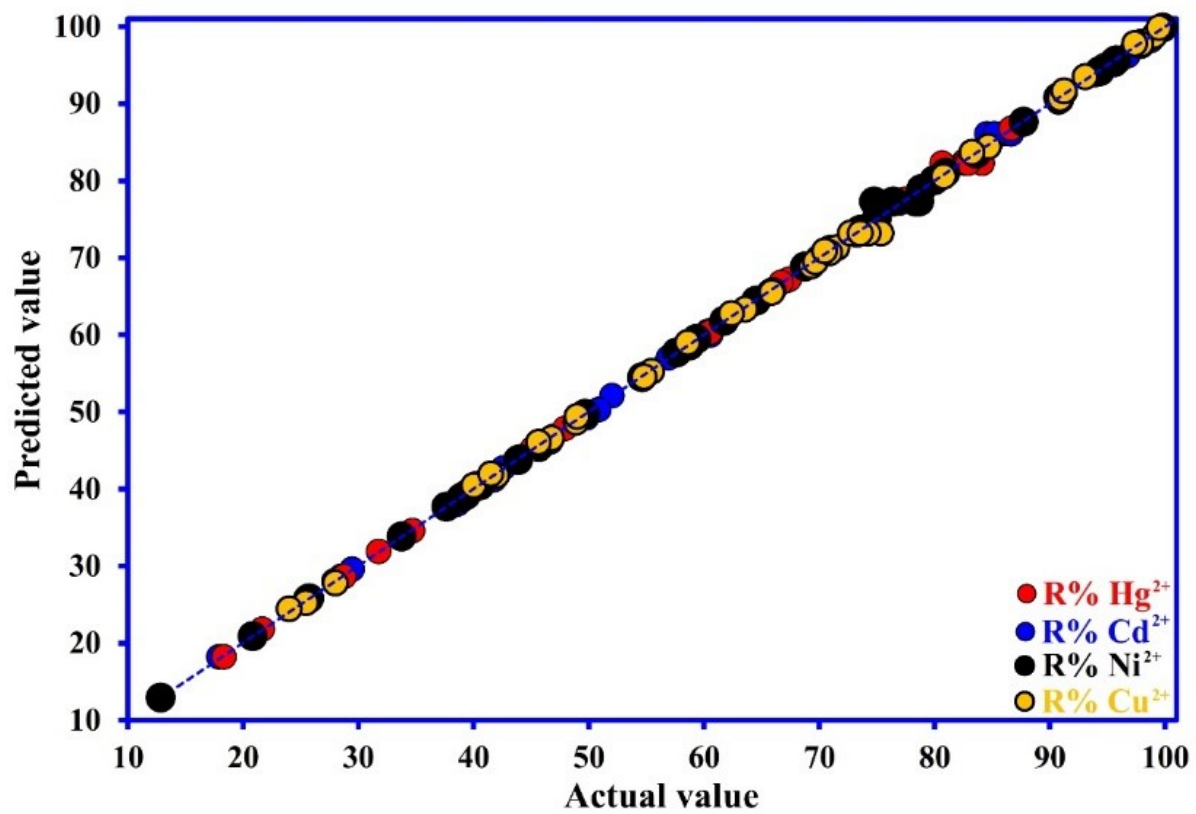

Fig. S1. Scatter plot of actual vs. predicted values of heavy metal ions removal by SMACNT-MIIP.

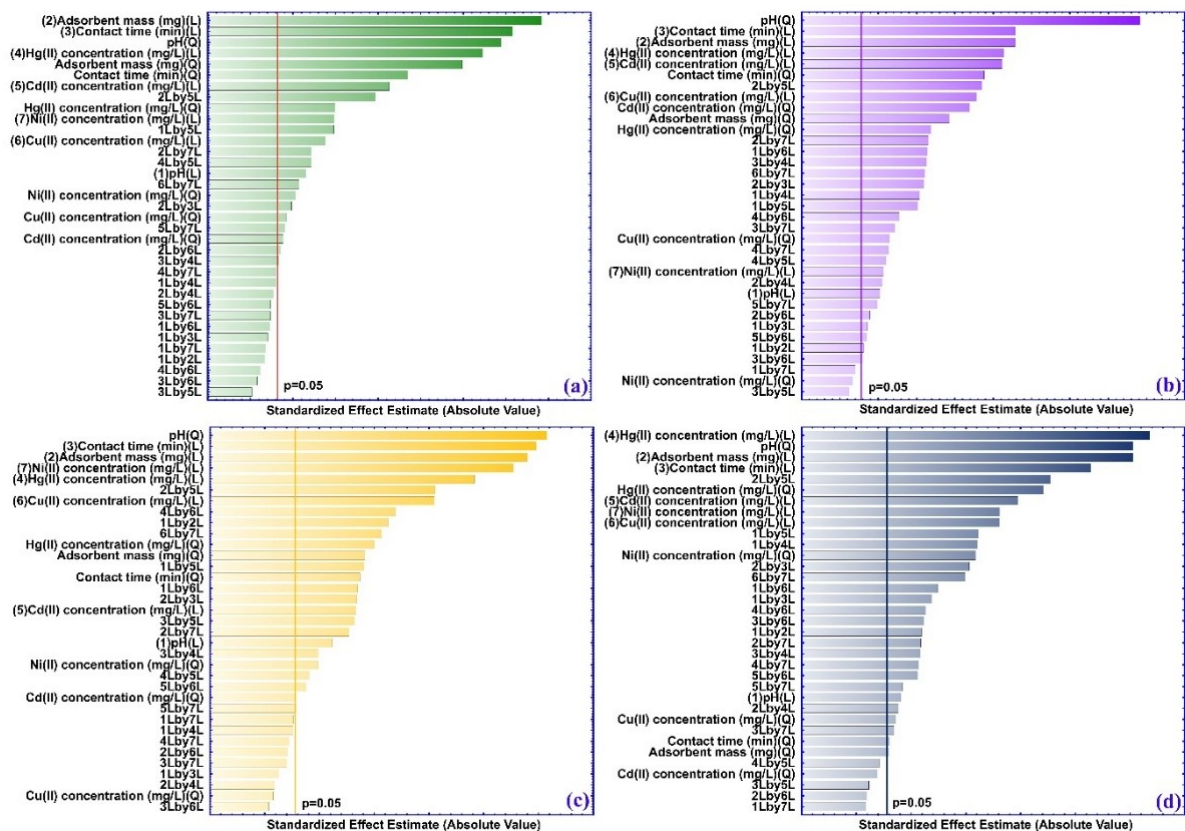

**Fig. S2.** Pareto charts of effective independent valuables for removal of (a) Hg<sup>2+</sup>, (b) Cd<sup>2+</sup>, (c) Ni<sup>2+</sup>, and (d) Cu<sup>2+</sup> metal ions by SMACNT-MIIP.

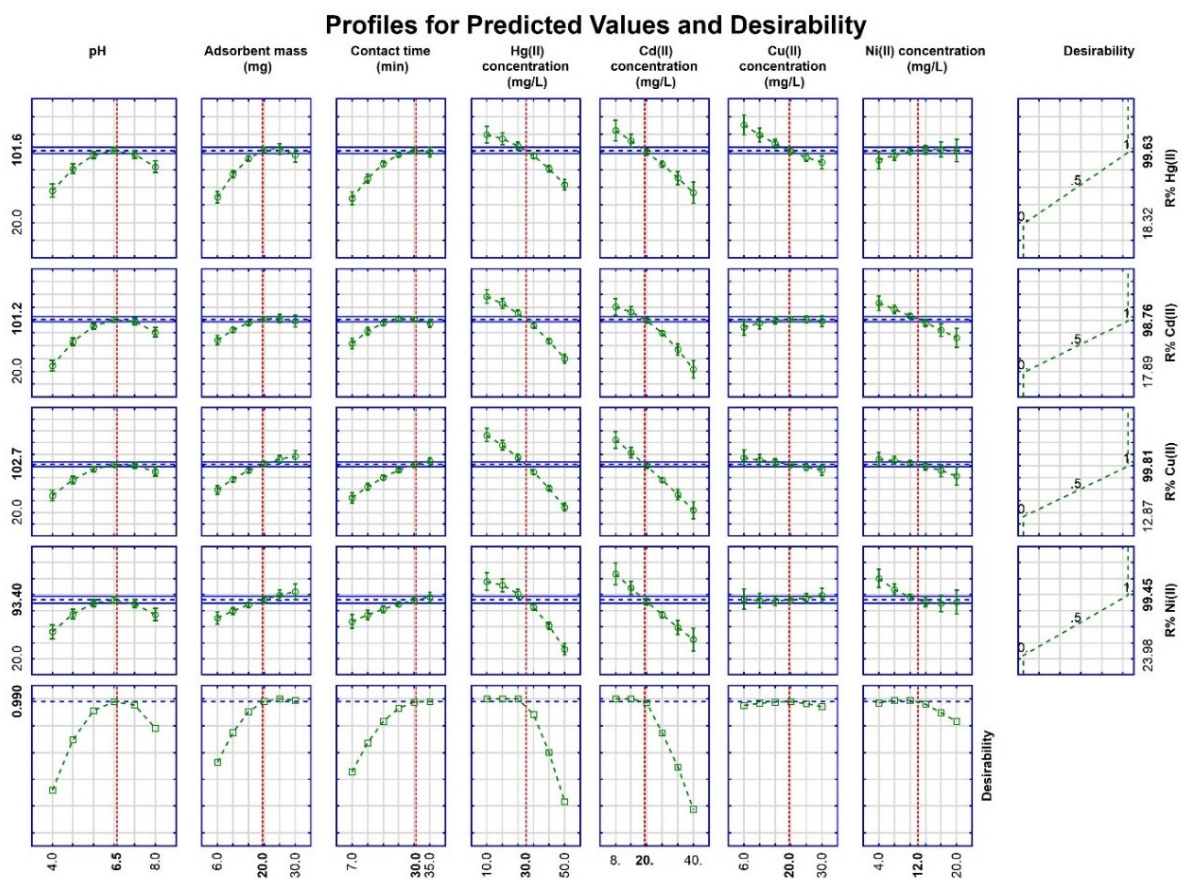

**Fig. S3.** Profiles for predicted values and desirability function for the removal of heavy metal ions by SMACNT-MIIP. Red lines indicate optimized values for each independent parameter.
